# Supplementary material for: Induction of Cyclooxygenase-2 by Overexpression of the Human NADPH Oxidase 5 (NOX5) Gene in Aortic Endothelial Cells
Source: PubMed Central journal article supplement (PMC7140418; doi:10.3390/cells9030637), 2020-03-06
Supplement: cells-09-00637-s001.pdf [file cells-09-00637-s001.pdf]

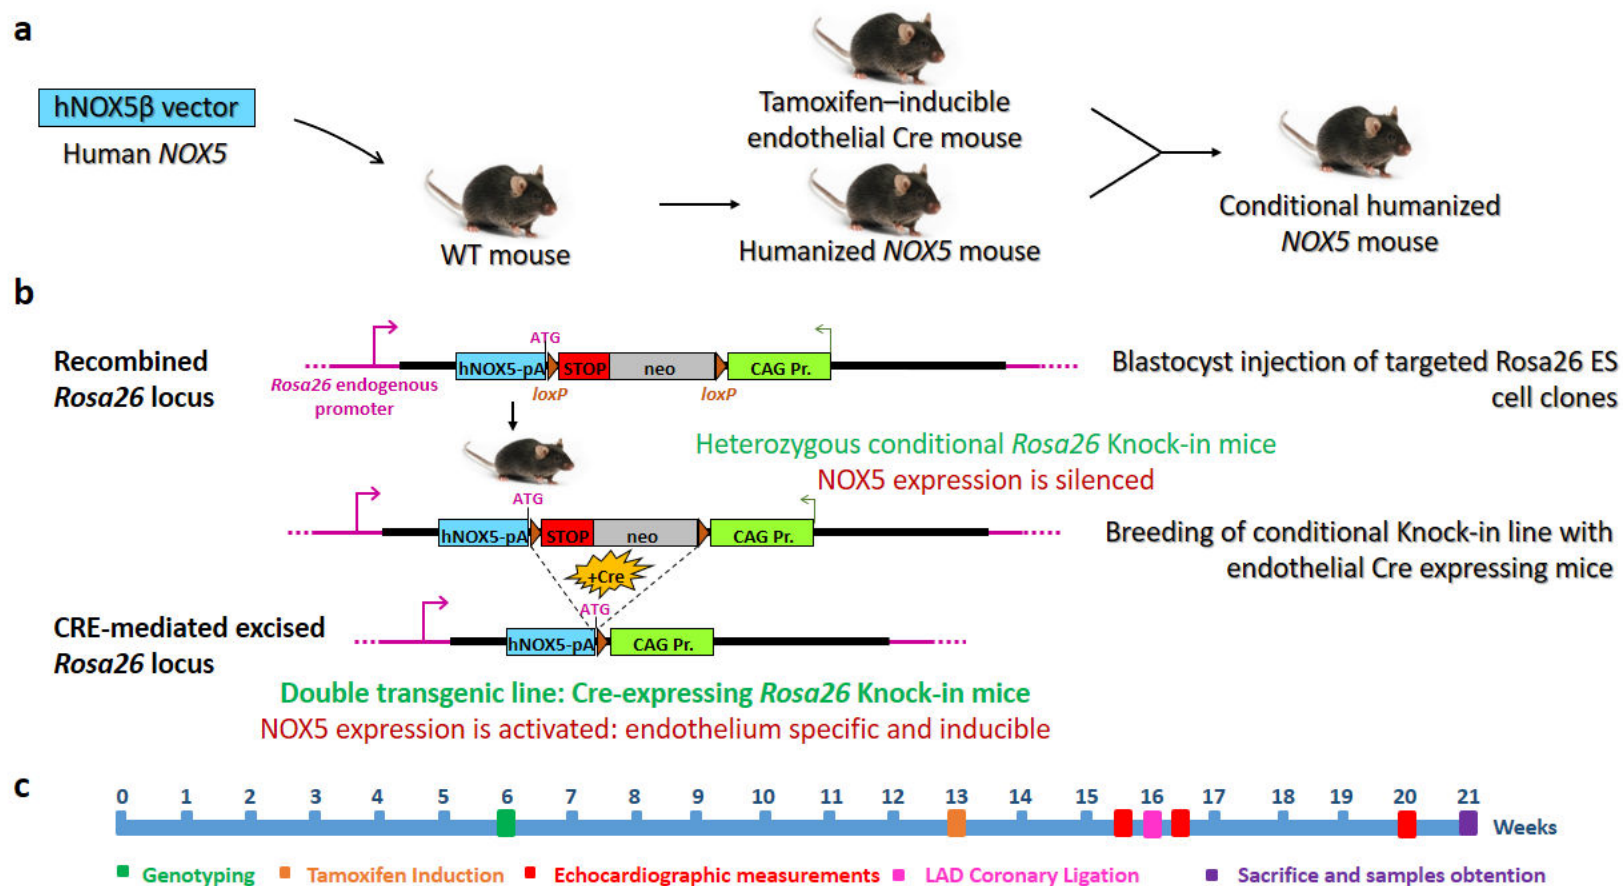

**Figure S1. Generation of the endothelial CRE-expressing knock-in mouse and experimental design.** (a) Representative schematic of the humanized NOX5 mouse. NOX5 gene located on the chromosome 6 was engineered in heterozygosity, thus resulting in mice with a single copy of the gene both in males and females. (b) Construction of the conditional humanized NOX5-KI mouse. Purple and black lines represent genomic sequences located in the endogenous *Rosa26* locus and in the targeting vector to insert NOX5, respectively. *LoxP* sites are shown as brown triangles. The NOX5 cDNA plus the hGH polyA are depicted as a blue box. The combined STOP-neomycin cassette is represented by a red-grey box and the CAG promoter by a green box. (c) Representative schedule of the humanized NOX5 infarcted mice.

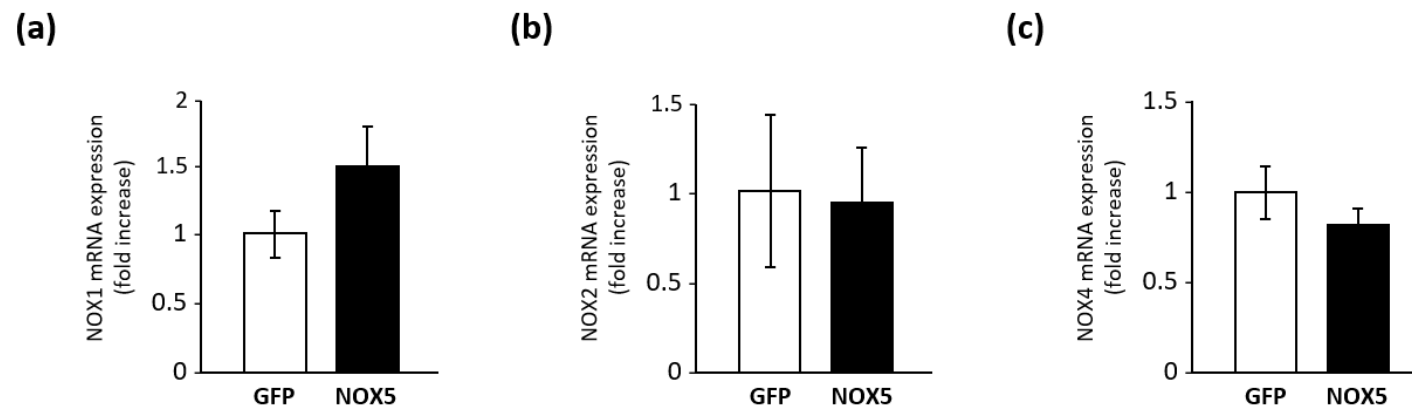

**Figure S2. Effects of NOX5- $\beta$  overexpression on NOX expression in TeloHAEC. (a) NOX1 (b) NOX2 and (c) NOX4 mRNA levels in NOX5- $\beta$  and GFP-infected cells for 24 h. n=6.**

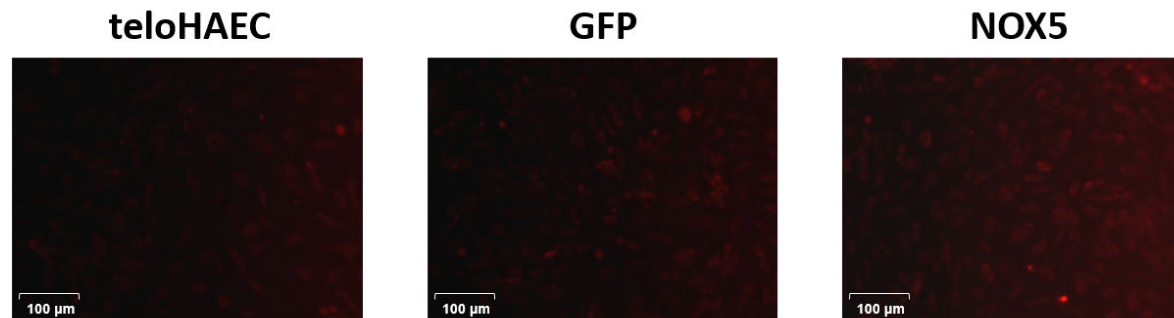

**Figure S3. Effect of NOX5- $\beta$  overexpression on DHE oxidation in TeloHAEC.** Images show superoxide production of non-infected cells and cells infected with GFP or NOX5- $\beta$  adenoviruses. Briefly, TeloHAEC cells were cultured in 96-well black clear-bottom plates and infected with adenovirus encoding GFP or NOX5- $\beta$ . Next day, cells were washed and incubated at 37 °C in the dark with 100  $\mu$ M DHE for 5 min. Then, cells were washed and fluorescent images were obtained in a ZOE Fluorescent Cell Imager (Bio-Rad). Representative images are shown.

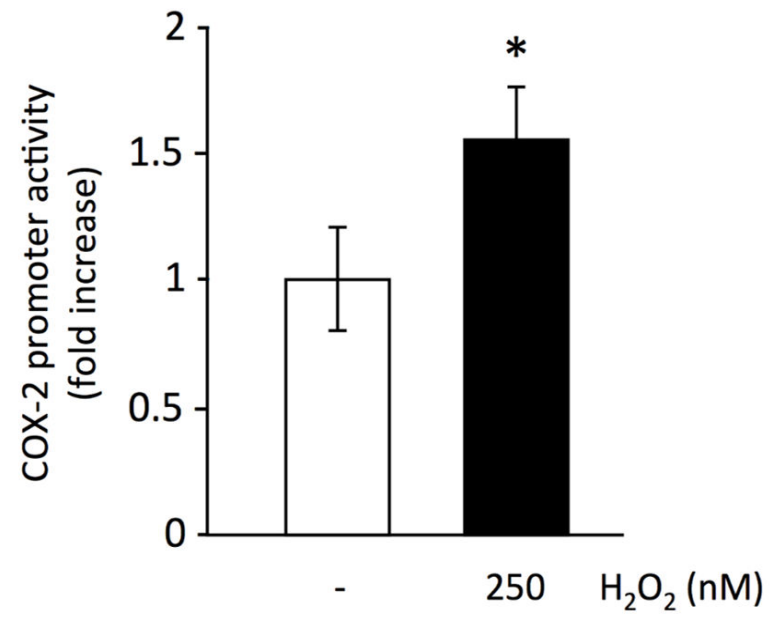

**Figure S4.** Effect of H<sub>2</sub>O<sub>2</sub> on COX-2 promoter transcriptional activity in Telo HAEC. n=6. \**p*<0.05.

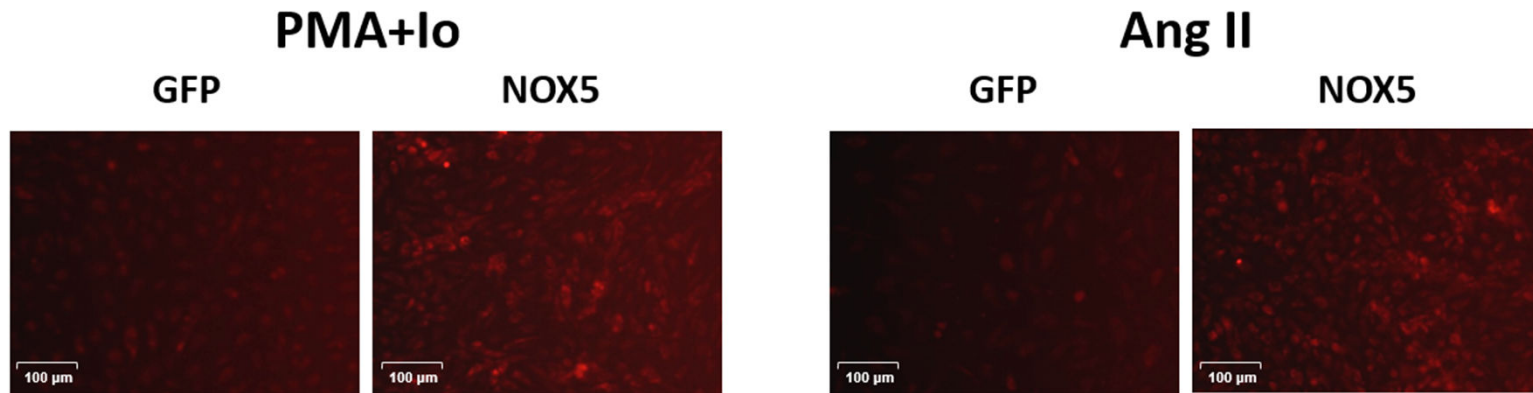

**Figure S5. Effect of stimulation with PMA+Io or angiotensin II (Ang II) on superoxide production in GFP- and NOX5- $\beta$ -infected TeloHAECs.** Stimulation with PMA+Io and Ang II enhanced DHE oxidation more in NOX5- $\beta$  infected cells than in GFP infected cells. Images show superoxide production of cells infected with GFP or NOX5- $\beta$  adenoviruses, and stimulated with PMA+Io or Ang II. Briefly, TeloHAEC cells were cultured in 96-well black clear-bottom plates and infected with adenovirus encoding GFP or NOX5- $\beta$ . Next day, cells were stimulated with PMA+Io or with Ang II for 1 h and finally incubated at 37 °C in the dark with 100  $\mu$ M DHE for 5 min. Then, cells were washed and fluorescent images were obtained in a ZOE Fluorescent Cell Imager (Bio-Rad). Representative images are shown.

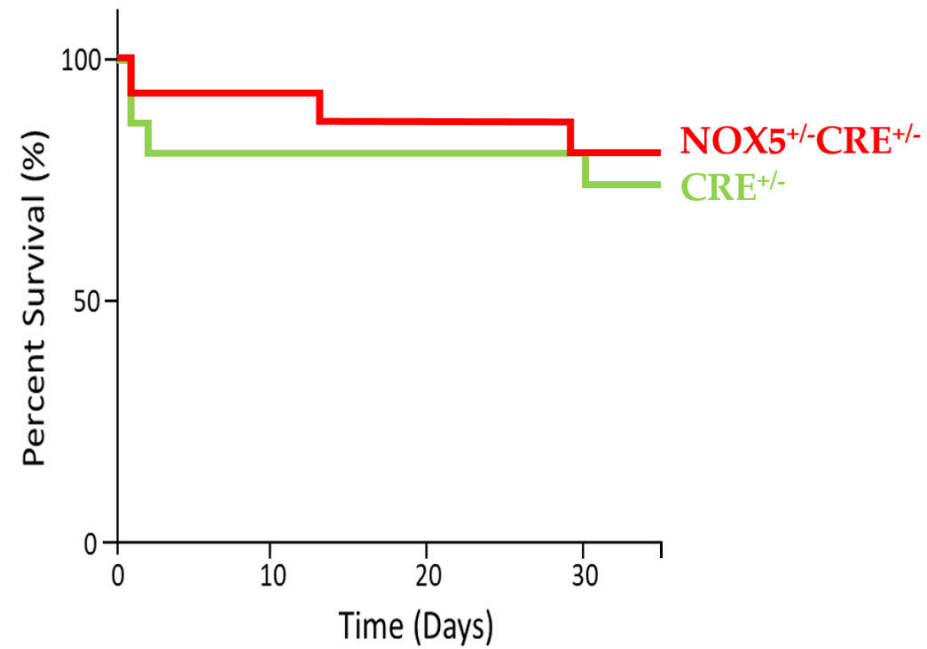

**Figure S6. Survival analysis after permanent ligation of the left anterior descending coronary artery (LAD).**  $\text{CRE}^{+/-}$ : mice with  $\text{CRE}^{+/-}$  genotype (n=16).  $\text{NOX5}^{+/-}\text{CRE}^{+/-}$ : mice with  $\text{NOX5}^{+/-}\text{CRE}^{+/-}$  genotype. (n=16).

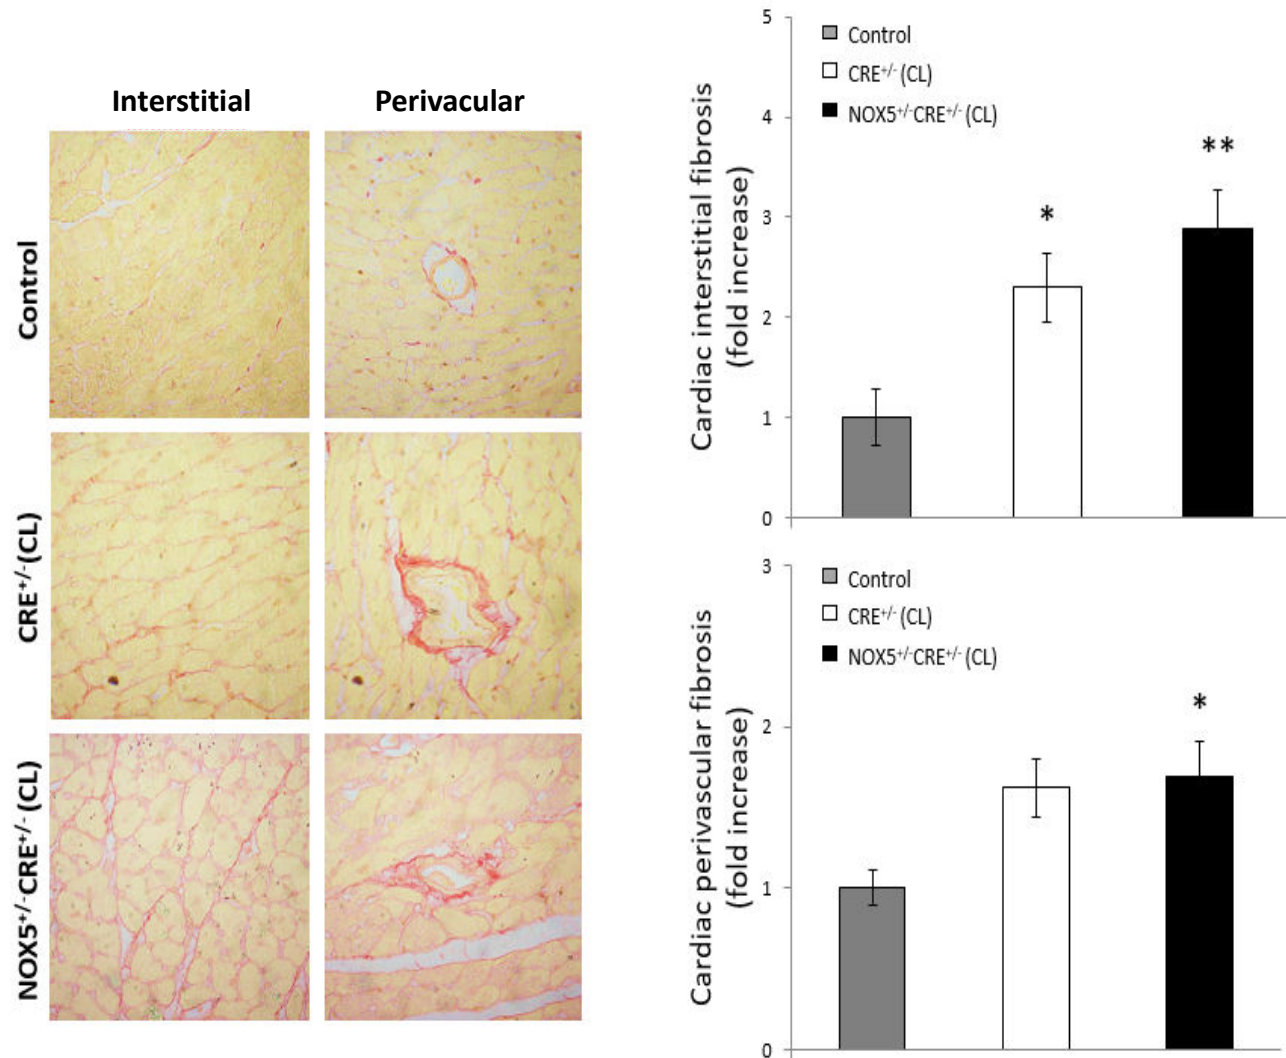

**Figure S7. Myocardial interstitial and perivascular fibrosis.** Control: mice with no LAD coronary ligation (N=10). CRE<sup>+/-</sup> (CL): mice with CRE genotype and LAD coronary ligation (N=12). NOX5<sup>+/-</sup> CRE<sup>+/-</sup> : mice with NOX5<sup>+/-</sup> CRE<sup>+/-</sup> genotype and coronary ligation (N=13). \**p*<0.05 vs Control. \*\**p*<0.001 vs Control. Data are represented as mean±SEM. Histological pictures were taken at 20x. LAD, ligation of the left anterior descending coronary artery. CL, coronary ligation.

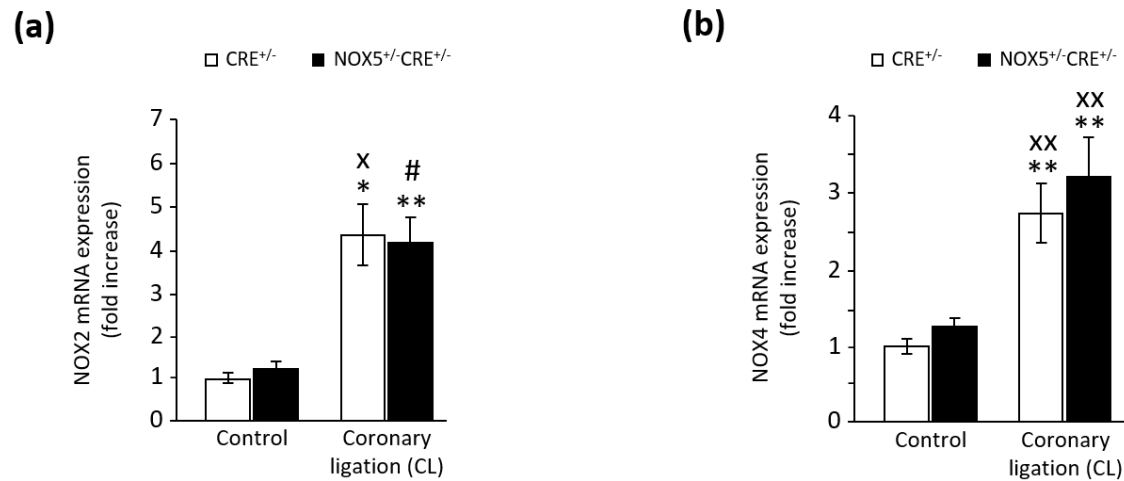

**Figure S8. Quantification of NOX enzymes in the heart of mice.** (a) NOX2 mRNA expression in control and infarcted mice. \* $p < 0.05$  vs CRE<sup>+/-</sup>, \*\* $p < 0.01$  vs CRE<sup>+/-</sup>, <sup>x</sup> $p < 0.05$  vs NOX5<sup>+/-</sup>-CRE<sup>+/-</sup>, <sup>xx</sup> $p < 0.01$  vs NOX5<sup>+/-</sup>-CRE<sup>+/-</sup>. (b) NOX4 mRNA expression in control and infarcted mice. \*\* $p < 0.01$  vs CRE<sup>+/-</sup>, <sup>xx</sup> $p < 0.01$  vs NOX5<sup>+/-</sup>-CRE<sup>+/-</sup>. Control, control mice with no MI. Coronary ligation (CL), mice that suffered MI by LAD coronary ligation. CRE<sup>+/-</sup>, mice with CRE<sup>+/-</sup> genotype (n=9 for CRE<sup>+/-</sup> and NOX5<sup>+/-</sup>-CRE<sup>+/-</sup> groups). NOX5<sup>+/-</sup>-CRE<sup>+/-</sup>, mice with NOX5<sup>+/-</sup>-CRE<sup>+/-</sup> genotype (n=12 for CRE<sup>+/-</sup>-CL group, and n=13 for NOX5<sup>+/-</sup>-CRE<sup>+/-</sup>-CL group).

NOX5 mRNA was detected only in NOX5<sup>+/-</sup>-CRE<sup>+/-</sup> mice, although no differences were found between control and MI groups (*data not shown*).
